# Supplementary material for: The inner ear of caviomorph rodents: Phylogenetic implications and application to extinct West Indian taxa
Source: Springer Nature journal article supplement (doi:10.1007/s10914-023-09675-3), 2023-07-28
Supplement: 10914_2023_9675_MOESM2_ESM.pdf [file 10914_2023_9675_MOESM2_ESM.pdf]

# The inner ear of caviomorph rodents: phylogenetic implications and application to extinct West Indian taxa

## Journal of Mammalian Evolution

Léa Da Cunha<sup>1\*</sup>, Lázaro W. Viñola López<sup>2</sup>, Ross D. E. MacPhee<sup>3</sup>, Leonardo Kerber<sup>4</sup>, Jorge Vélez-Juarbe<sup>5</sup>, Pierre-Olivier Antoine<sup>1</sup>, Myriam Boivin<sup>6,7</sup>, Lionel Hautier<sup>1</sup>, Renaud Lebrun<sup>1</sup>, Laurent Marivaux<sup>1</sup> and Pierre-Henri Fabre<sup>1,3,8,9</sup>

<sup>1</sup>Institut des Sciences de l'Évolution de Montpellier, Univ Montpellier, CNRS, IRD, cc64, Place Eugène Bataillon, F-34095 Montpellier Cedex 05, France

<sup>2</sup>Florida Museum of Natural History, University of Florida, Gainesville, FL 32611-7800, USA

<sup>3</sup> Mammalogy/Vertebrate Zoology, American Museum of Natural History, 200 Central Park West, New York, NY 10024, USA

<sup>4</sup> Centro de Apoio à Pesquisa Paleontológica (CAPP) da Quarta Colônia, Universidade Federal de Santa Maria, São João do Polêsine, Rua Maximiliano Vizzotto, 598, CEP 97230-000, Brasil

<sup>5</sup> Department of Mammalogy, Natural History Museum of Los Angeles County, 900 Exposition Boulevard, Los Angeles, CA 90007, USA

<sup>6</sup> Laboratorio de Paleontología de Vertebrados, Instituto de Ecorregiones Andinas (INECOA), Universidad Nacional de Jujuy (UnJu), CONICET, Av. Bolivia 1661, San Salvador de Jujuy 4600, Jujuy, Argentina

<sup>7</sup> Instituto de Geología y Minería, UNJu, Av. Bolivia 1661, San Salvador de Jujuy 4600, Jujuy, Argentina

<sup>8</sup> Mammal Section, Life Sciences, Vertebrate Division, The Natural History Museum, London, UK

<sup>9</sup> Institut Universitaire de France (IUF), Paris, France

\* **Corresponding author**      Léa Da Cunha  
Laboratoire de Paléontologie, c.c. 064  
Institut des Sciences de l'Évolution de Montpellier  
(ISE-M, UMR 5554 CNRS/UM/IRD)  
Université de Montpellier, Bât. 22, RDC  
Place Eugène Bataillon  
34095 Montpellier cedex 05  
France  
E-mail: [lea.da-cunha@umontpellier.fr](mailto:lea.da-cunha@umontpellier.fr)  
ORCID identifier: <https://orcid.org/0009-0000-6479-8419>

## Appendix S2

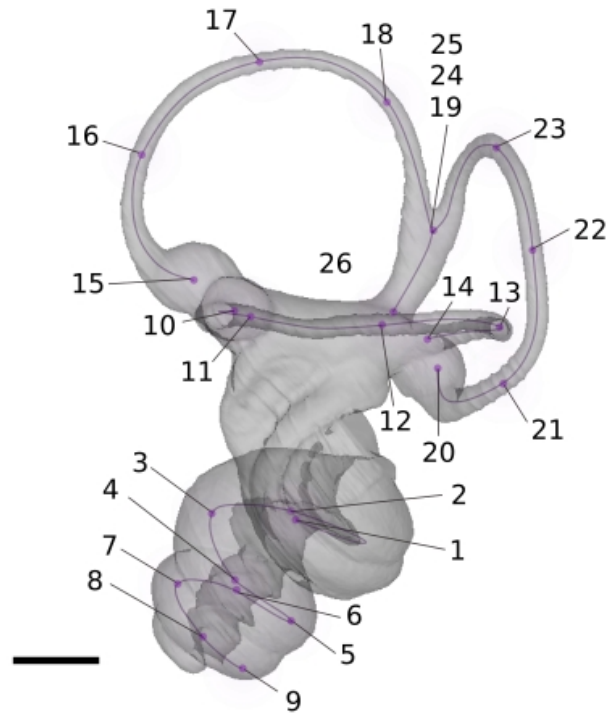

**Fig. 1** Position of the landmarks used for creating the curves on the left inner ear of *Pattonomys carrikeri* (USNM 498985). Scale = 1mm

**Table 1** Landmarks used for curve definition

| N° | Name                              | Definition                                                          |
|----|-----------------------------------|---------------------------------------------------------------------|
| 1  | Helix basis                       | Point centered below the cochlear fenestra, on the secondary lamina |
| 2  | Helix mediodorsal                 | Most mediodorsal point of the first turn of the cochlea             |
| 3  | Helix anterodorsal                | Most anterodorsal point of the first turn of the cochlea            |
| 4  | Helix laterodorsal                | Most laterodorsal point of the first turn of the cochlea            |
| 5  | Helix posterodorsal               | Most posterodorsal point of the second turn of the cochlea          |
| 6  | Helix medioventral                | Most medioventral point of the second turn of the cochlea           |
| 7  | Helix anteroventral               | Most anteroventral point of the second turn of the cochlea          |
| 8  | Helix lateroventral               | Most lateroventral point of the second turn of the cochlea          |
| 9  | Helix posteroventral              | Most posteroventral point of the third turn of the cochlea          |
| 10 | Canalis lateralis ampulla         | Center of the ampulla of the lateral semicircular canal             |
| 11 | Canalis lateralis anterolateral   | Most anterolateral point of the lateral semicircular canal          |
| 12 | Canalis lateralis lateral         | Most lateral point of the lateral semicircular canal                |
| 13 | Canalis lateralis postero-lateral | Most posterolateral point of the lateral semicircular canal         |
| 14 | Canalis lateralis posterior       | Most posterior point of the lateral semicircular canal              |
| 15 | Canalis anterior ampulla          | Center of the ampulla of the anterior semicircular canal            |
| 16 | Canalis anterior anteroventral    | Most anteroventral point of the anterior semicircular canal         |
| 17 | Canalis anterior posterodorsal    | Most posterodorsal point of the anterior semicircular canal         |
| 18 | Canalis anterior posterodorsal    | Most posterodorsal point of the anterior semicircular canal         |
| 19 | Crus commune apex*                | Junction between the anterior and posterior semicircular canal      |
| 20 | Canalis posterior ampulla         | Center of the ampulla of the posterior semicircular canal           |
| 21 | Canalis posterior posteroventral  | Most posteroventral point of the posterior semicircular canal       |
| 22 | Canalis posterior posterodorsal   | Most posterodorsal point of the posterior semicircular canal        |
| 23 | Canalis posterior anterodorsal    | Most anterodorsal point of the anterior semicircular canal          |
| 24 | Crus commune apex*                | Junction between the anterior and posterior semicircular canal      |
| 25 | Crus commune apex                 | Junction between the anterior and posterior semicircular canal      |
| 26 | Crus commune base                 | Junction between the common crus and the vestibule                  |

\*redundant landmarks removed from the geometric morphometric analysis in R.

**Table 2** Description of the starting and ending landmarks used for the curves definition and resampled semilandmarks

| N° | Curve   | Starting curve landmark | Ending curve landmark | Semilandmarks resampled |
|----|---------|-------------------------|-----------------------|-------------------------|
| 1  | Cochlea | n°1                     | n°9                   | 20                      |
| 2  | LSC     | n°10                    | n°14                  | 20                      |
| 3  | ASC     | n°15                    | n°19                  | 15                      |
| 4  | PSC     | n°20                    | n°24                  | 15                      |
| 5  | CC      | n°25                    | n°26                  | 5                       |

SC: semicircular canal; ASC: anterior semicircular canal; LSC: lateral semicircular canal; PSC: posterior semicircular canal; CC: common crus

### Geometric morphometrics protocol

All the landmarks were placed at the center of the lumen of the different parts of the inner ear (semicircular canals and cochlea). For the cochlea, two and a half turns were digitized as it is the minimal number of coils observed in our sample (Perier et al 2016; Schweizer et al 2017). Because the variation in the number of turns of the cochlea in the specimens of our sample is important (2.5 to 4.75 turns, see Online Resource 1), we couldn't digitize the morphology of the structure with the same amount of landmarks for all specimens. It would have been necessary to either add more landmarks to reconstruct the curves for specimens with longer cochleas, or to reposition the landmarks in spatially different positions across specimens. In both cases, this goes against the fundamental criteria of landmark positioning (Zelditch et al. 2012) and would have probably induced extreme strong artefactual distortion of the distances between landmarks, and therefore shape analyses, after Procrustes superimposition. Therefore, we worked under the assumption of homology of cochlear turns (Table 1; Fig. 1: landmarks n° 1-9) and completed the study with complementary linear measurements to account for the morphological variation of the cochlea.

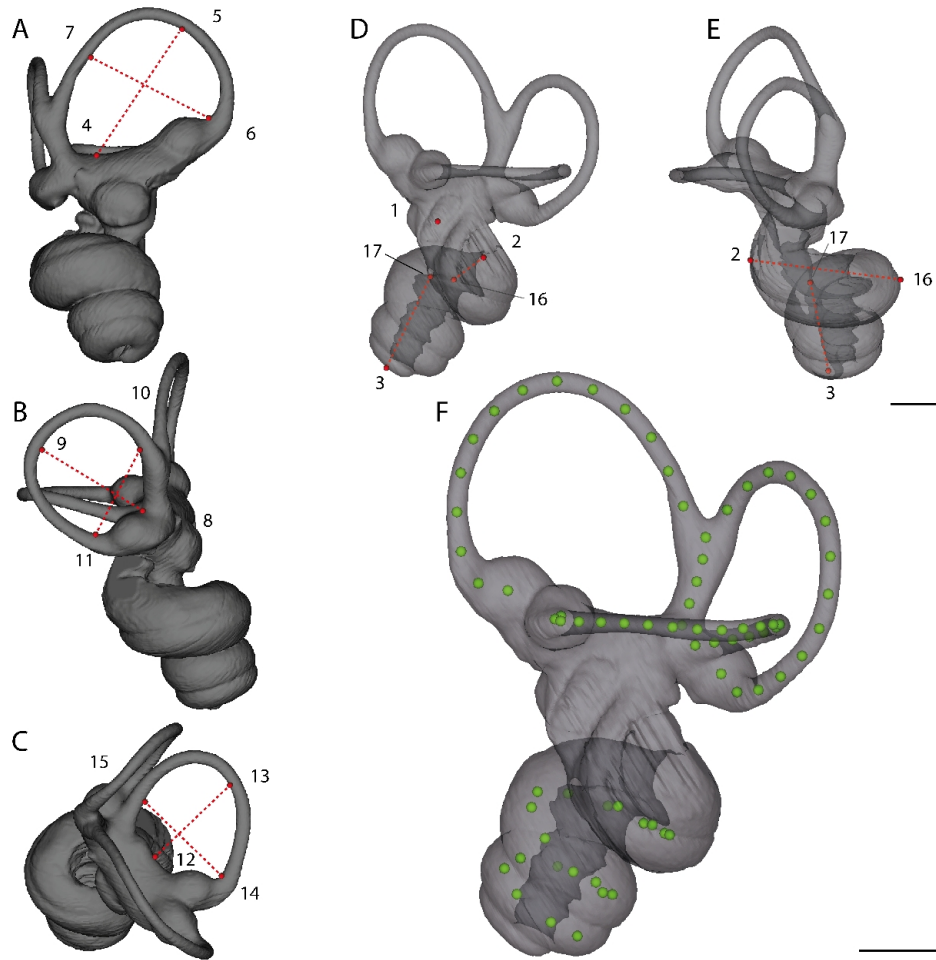

**Fig. 2** Landmarks used for linear measurements (A-E) and semilandmarks sampling (F) of the left inner ear of *Pattonomys carrikeri* (USNM 498985). (A) Landmarks 4-5 were used to measure the height of the ASC, and landmarks 6-7 its width. (B) Landmarks 8-9 were used to measure the height of the PSC, and landmarks 10-11 its width. (C) Landmarks 12-13 were used to measure the length of the LSC, and landmarks 14-15 its width. (D-E) Landmarks 2-16 were used to measure the width of the cochlea, and landmarks 3-17 the height of the cochlea. Upper scale is used for (A-E), and lower scale for (F). Scale bars = 1 mm

**Table 3** Landmarks from the linear measurements

| N° | Name                          | Definition                                                                                                         |
|----|-------------------------------|--------------------------------------------------------------------------------------------------------------------|
| 1  | Fenestra vestibuli            | Center of the vestibular fenestra                                                                                  |
| 2  | Fenestra cochlea              | Center of the cochlear fenestra                                                                                    |
| 3  | Helix apex                    | Ventral-most point of the helix of the cochlea                                                                     |
| 4  | Canalis anterior inferior     | Inferior-most point of the inner side of the anterior semicircular canal                                           |
| 5  | Canalis anterior superior     | Superior-most point of the inner side of the anterior semicircular canal                                           |
| 6  | Canalis anterior ampulla      | Anterolateral-most point of the inner side of the anterior semicircular canal, next to the anterior ampulla        |
| 7  | Canalis anterior common crus  | Posteromedial-most point of the inner side of the anterior semicircular canal                                      |
| 8  | Canalis posterior inferior    | Inferior-most most point of the inner side of the posterior semicircular canal                                     |
| 9  | Canalis posterior superior    | Superior-most point of the inner side of the posterior semicircular canal                                          |
| 10 | Canalis posterior ampulla     | Anterolateral-most point of the inner side of the posterior semicircular canal, next to the posterior ampulla      |
| 11 | Canalis posterior common crus | Posterolateral-most point of the inner side of the posterior semicircular canal                                    |
| 12 | Canalis lateral proximal      | Proximal-most point of the inner side of the lateral semicircular canal, in contact with the vestibule             |
| 13 | Canalis lateral distal        | Distal-most point of the inner side of the lateral semicircular canal                                              |
| 14 | Canalis lateral anterior      | Anterior-most most point of the inner side of the lateral semicircular canal, next to the lateral ampulla          |
| 15 | Canalis lateral posterior     | Posterior-most most point of the inner side of the lateral semicircular canal                                      |
| 16 | Helix posteromedial           | Posteromedial-most point of the first coil of the cochlea: it is the farthest away point from the fenestra cochlea |
| 17 | Helix junction                | Center of the junction of the first and second turns of the cochlea                                                |

**Table 4** Definition of the abbreviations used for the linear measurements in the specimen table of Appendix S1

| <b>Abbreviations</b> | <b>Definition</b>                                                                         |
|----------------------|-------------------------------------------------------------------------------------------|
| LS                   | Length of the skull                                                                       |
| LN                   | Length of the nasal bone                                                                  |
| IEH                  | Height of the inner ear                                                                   |
| LCo                  | Length of the cochlea                                                                     |
| HCo                  | Height of the cochlea                                                                     |
| WCo                  | Width of the cochlea                                                                      |
| ASCH                 | Height of the anterior semicircular canal                                                 |
| ASCW                 | Width of the anterior semicircular canal                                                  |
| PSCH                 | Height of the posterior semicircular canal                                                |
| PSCW                 | Width of the posterior semicircular canal                                                 |
| LSCH                 | Height of the lateral semicircular canal                                                  |
| LSCW                 | Width of the lateral semicircular canal                                                   |
| Angle ASC-PSC*       | Angle in degrees between the anterior semicircular canal and posterior semicircular canal |
| Angle ASC-LSC*       | Angle in degrees between the anterior semicircular canal and lateral semicircular canal   |
| Angle PSC-LSC*       | Angle in degrees between the posterior semicircular canal and lateral semicircular canal  |
| Radius ASC           | Radius of curvature of the anterior semicircular canal                                    |
| Radius PSC           | Radius of curvature of the posterior semicircular canal                                   |
| Radius LSC           | Radius of curvature of the lateral semicircular canal                                     |
| SCR                  | Mean of the radii of curvature of the semicircular canals                                 |
| SCR_ratio*           | Relative proportion of the semicircular canals                                            |
| Co_ratio*            | Cochlear aspect                                                                           |

All linear measurements are in millimeters (mm) with the exception of the angles, SCR\_ratio and Co\_ratio specified by an asterisk (\*).

## Linear measurements protocol

### Radii of curvature of the SCs

Linear measurements follow the protocol of Spoor & Zonneveld (1998) for the semicircular canals (Fig. 2; Table 3). It allowed us to measure the radii of curvature of each of the SC (see Spoor et al 2007):

$$\text{Radius SC} = \frac{0.5 \times (\text{Height of the SC} + \text{Width of the SC})}{2}$$

### Relative proportion of the the semicircular canals

$$\text{SCR/IEH}_i = \frac{\text{Mean of the } \sum \text{ of the radii of curvature of the semicircular canals}}{\text{Inner ear height}}$$

### Angles of the SCs

First, mean planes of the SC were calculated from all their corresponding semilandmarks. Then, we measured angles between each of these planes to get angles between anterior and posterior SCs, anterior and lateral SCs, and posterior and lateral SCs (Schweizer et al 2017).

### Cochlear aspect

Measurements of the cochlea are inspired from Ekdale (2013) but differ as follow: in its study, the height of the cochlea is the maximal distance between the helix apex and the dorsal surface of the first coil, perpendicular to the width of the basal turn. Here, we considered the height of the cochlea as the distance between the helix apex, and the junction between the first and two coils. This position of the point is homologous and is easily repeatable in our sample. However, this has the disadvantage that it does not allow comparison with other groups in precedent studies.

The ratio of the cochlea was measured as follow:

$$R = \frac{\text{Height of the cochlea}}{\text{Width of the basal turn}}$$

Low cochlear ratio (from  $R = 1.5$  to  $R = 2$ ) characterizes a cochlea that is larger than taller, with a “flattened” aspect, whereas high cochlear (from  $R = 2.5$  to  $R = 3$ ) characterize a cochlea that is taller than larger with an “elongated” aspect. Finally, high cochlear ratio ( $R > 3$ ) illustrates a “very elongated” aspect that is coupled with a high number of coils of the cochlea.

### Number of turns of the cochlea

The number of turns (or coils) of the cochlea was measured in lateral view. Each time the cochlea crossed the dorsoventral axis from the middle of the fenestra cochlea, we added a whole turn. For the last turn of the cochlea, we looked at the position of the helix apex in ventral view and added one, two or three quarter of turns if it ended in posterior, medial or lateral parts of the cochlea. In the event that the coil ended in-between two orientations, we retained the lowest value.

## References

- Ekdale EG (2013) Comparative Anatomy of the Bony Labyrinth (Inner Ear) of Placental Mammals. PLOS ONE 8(6):e66624. <https://doi.org/10.1371/journal.pone.0066624>
- Mitteroecker P, Gunz P (2009) Advances in Geometric Morphometrics. *Evol Biol* 36(2):235–247. <https://doi.org/10.1007/s11692-009-9055-x>
- Perier A, Lebrun R, Marivaux L (2016) Different Level of Intraspecific Variation of the Bony Labyrinth Morphology in Slow- Versus Fast-Moving Primates. *J Mammal Evol* 23(4):353–368. <https://doi.org/10.1007/s10914-016-9323-3>
- Schweizer AV, Lebrun R, Wilson LAB, Costeur L, Schmelzle T, Sánchez-Villagra MR (2017) Size Variation under Domestication: Conservatism in the inner ear shape of wolves, dogs and dingoes. *Sci Rep* 7(1):13330. <https://doi.org/10.1038/s41598-017-13523-9>
- Spoor F, Garland T, Krovitz G, Ryan TM, Silcox MT, Walker A (2007) The primate semicircular canal system and locomotion. *PNAS* 104(26):10808–10812. <https://doi.org/10.1073/pnas.0704250104>
- Spoor F, Zonneveld F (1998) Comparative review of the human bony labyrinth. *American Journal of Physical Anthropology* 107(S27):211–251. [https://doi.org/10.1002/\(SICI\)1096-8644\(1998\)107:27+<211::AID-AJPA8>3.0.CO;2-V](https://doi.org/10.1002/(SICI)1096-8644(1998)107:27+<211::AID-AJPA8>3.0.CO;2-V)
- Zelditch ML, Swiderski DL, Sheets HD (2012) *Geometric Morphometrics for Biologists: A Primer*. Academic Press
