# Supplementary material for: The inner ear of caviomorph rodents: Phylogenetic implications and application to extinct West Indian taxa
Source: Springer Nature journal article supplement (doi:10.1007/s10914-023-09675-3), 2023-07-28
Supplement: 10914_2023_9675_MOESM3_ESM.pdf [file 10914_2023_9675_MOESM3_ESM.pdf]

# The inner ear of caviomorph rodents: phylogenetic implications and application to extinct West Indian taxa

## Journal of Mammalian Evolution

Léa Da Cunha<sup>1\*</sup>, Lázaro W. Viñola López<sup>2</sup>, Ross D. E. MacPhee<sup>3</sup>, Leonardo Kerber<sup>4</sup>, Jorge Vélez-Juarbe<sup>5</sup>, Pierre-Olivier Antoine<sup>1</sup>, Myriam Boivin<sup>6,7</sup>, Lionel Hautier<sup>1</sup>, Renaud Lebrun<sup>1</sup>, Laurent Marivaux<sup>1</sup> and Pierre-Henri Fabre<sup>1,3,8,9</sup>

<sup>1</sup> Institut des Sciences de l'Évolution de Montpellier, Univ Montpellier, CNRS, IRD, cc64, Place Eugène Bataillon, F-34095 Montpellier Cedex 05, France

<sup>2</sup> Florida Museum of Natural History, University of Florida, Gainesville, FL 32611-7800, USA

<sup>3</sup> Mammalogy/Vertebrate Zoology, American Museum of Natural History, 200 Central Park West, New York, NY 10024, USA

<sup>4</sup> Centro de Apoio à Pesquisa Paleontológica (CAPPA) da Quarta Colônia, Universidade Federal de Santa Maria, São João do Polêsine, Rua Maximiliano Vizzotto, 598, CEP 97230-000, Brasil

<sup>5</sup> Department of Mammalogy, Natural History Museum of Los Angeles County, 900 Exposition Boulevard, Los Angeles, CA 90007, USA

<sup>6</sup> Laboratorio de Paleontología de Vertebrados, Instituto de Ecorregiones Andinas (INECOA), Universidad Nacional de Jujuy (UNJu), CONICET, Av. Bolivia 1661, San Salvador de Jujuy 4600, Jujuy, Argentina

<sup>7</sup> Instituto de Geología y Minería, UNJu, Av. Bolivia 1661, San Salvador de Jujuy 4600, Jujuy, Argentina

<sup>8</sup> Mammal Section, Life Sciences, Vertebrate Division, The Natural History Museum, London, UK

<sup>9</sup> Institut Universitaire de France (IUF), Paris, France

### \* Corresponding author

Léa Da Cunha

Laboratoire de Paléontologie, c.c. 064

Institut des Sciences de l'Évolution de Montpellier

(ISE-M, UMR 5554 CNRS/UM/IRD)

Université de Montpellier, Bât. 22, RDC

Place Eugène Bataillon

34095 Montpellier cedex 05

France

E-mail: [lea.da-cunha@umontpellier.fr](mailto:lea.da-cunha@umontpellier.fr)

ORCID identifier: <https://orcid.org/0009-0000-6479-8419>

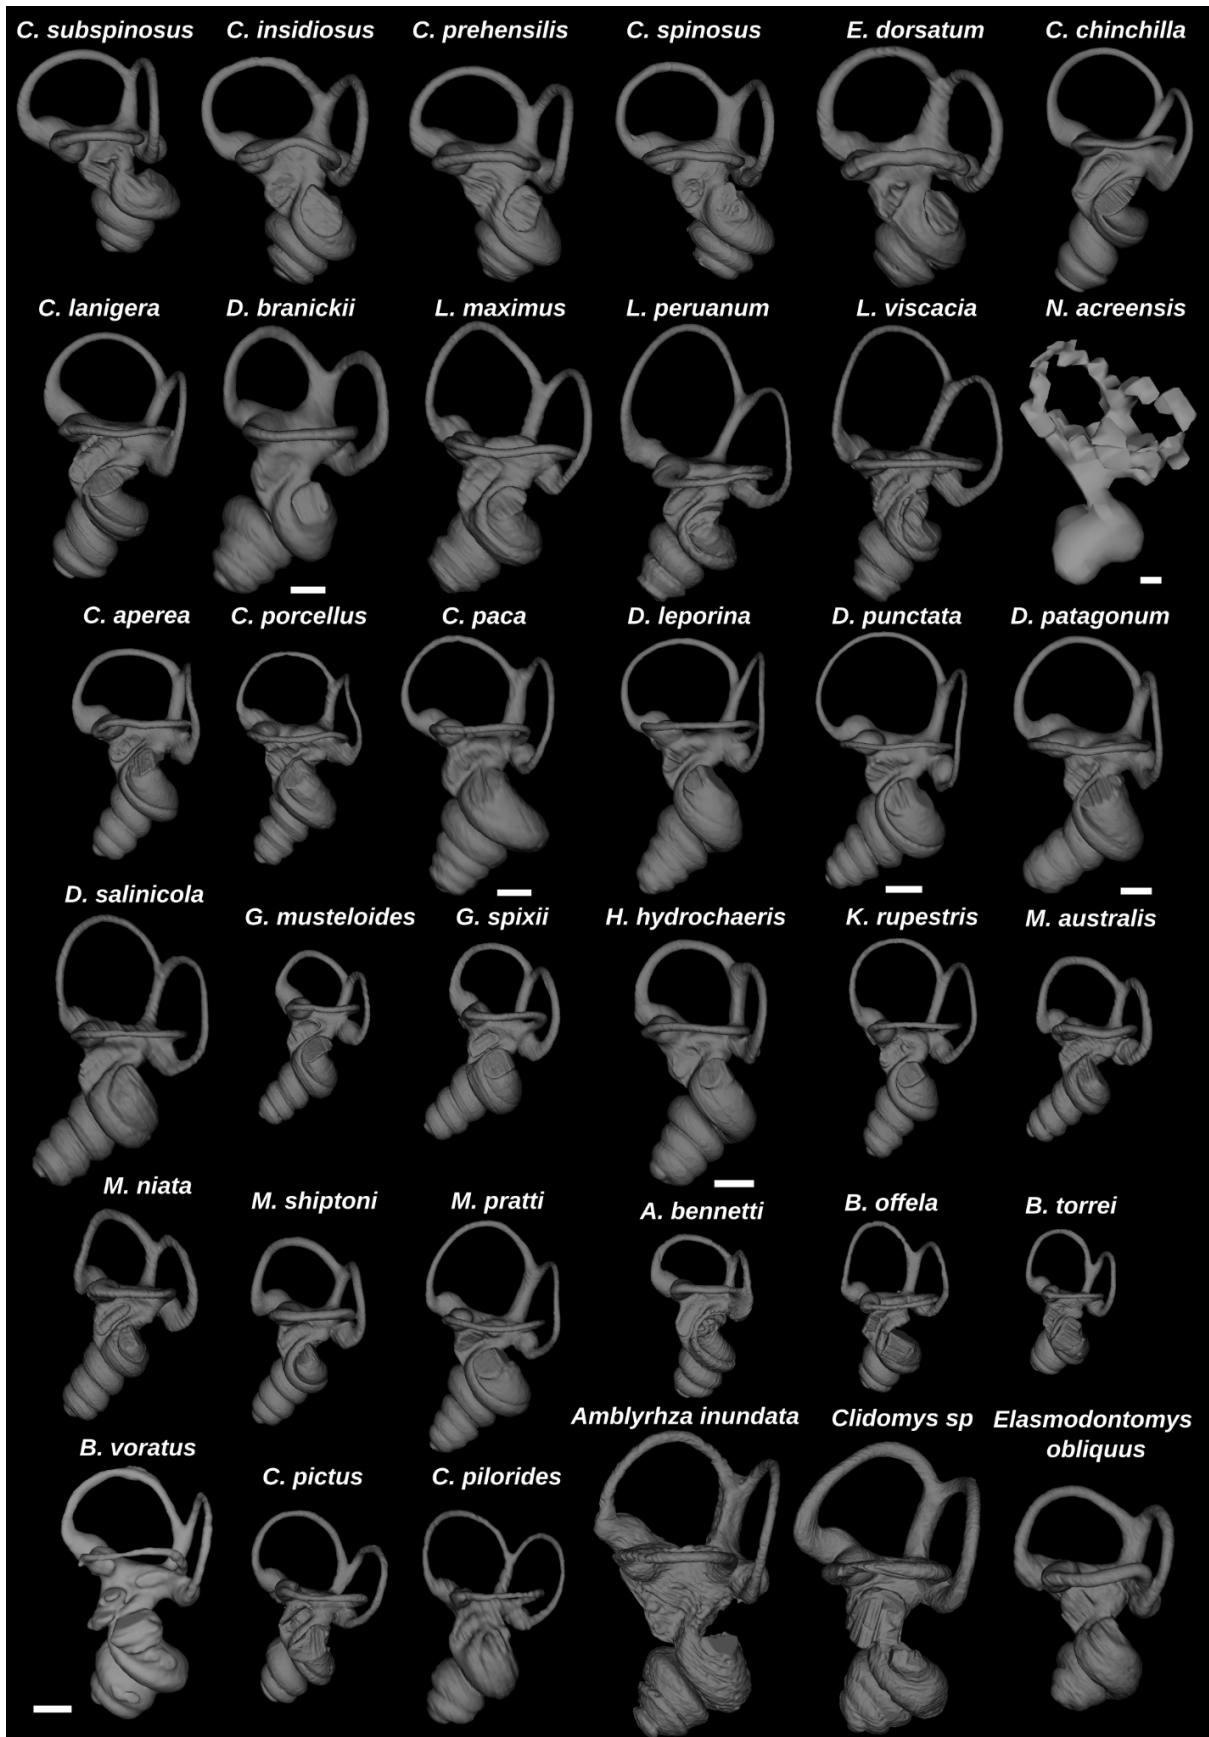

**Fig. S1** First part of the anatomical plate of the left inner ear of Caviomorpha in lateral view. Scale of all specimens is in the bottom left unless another one is specified for the corresponding species. Scale = 1mm

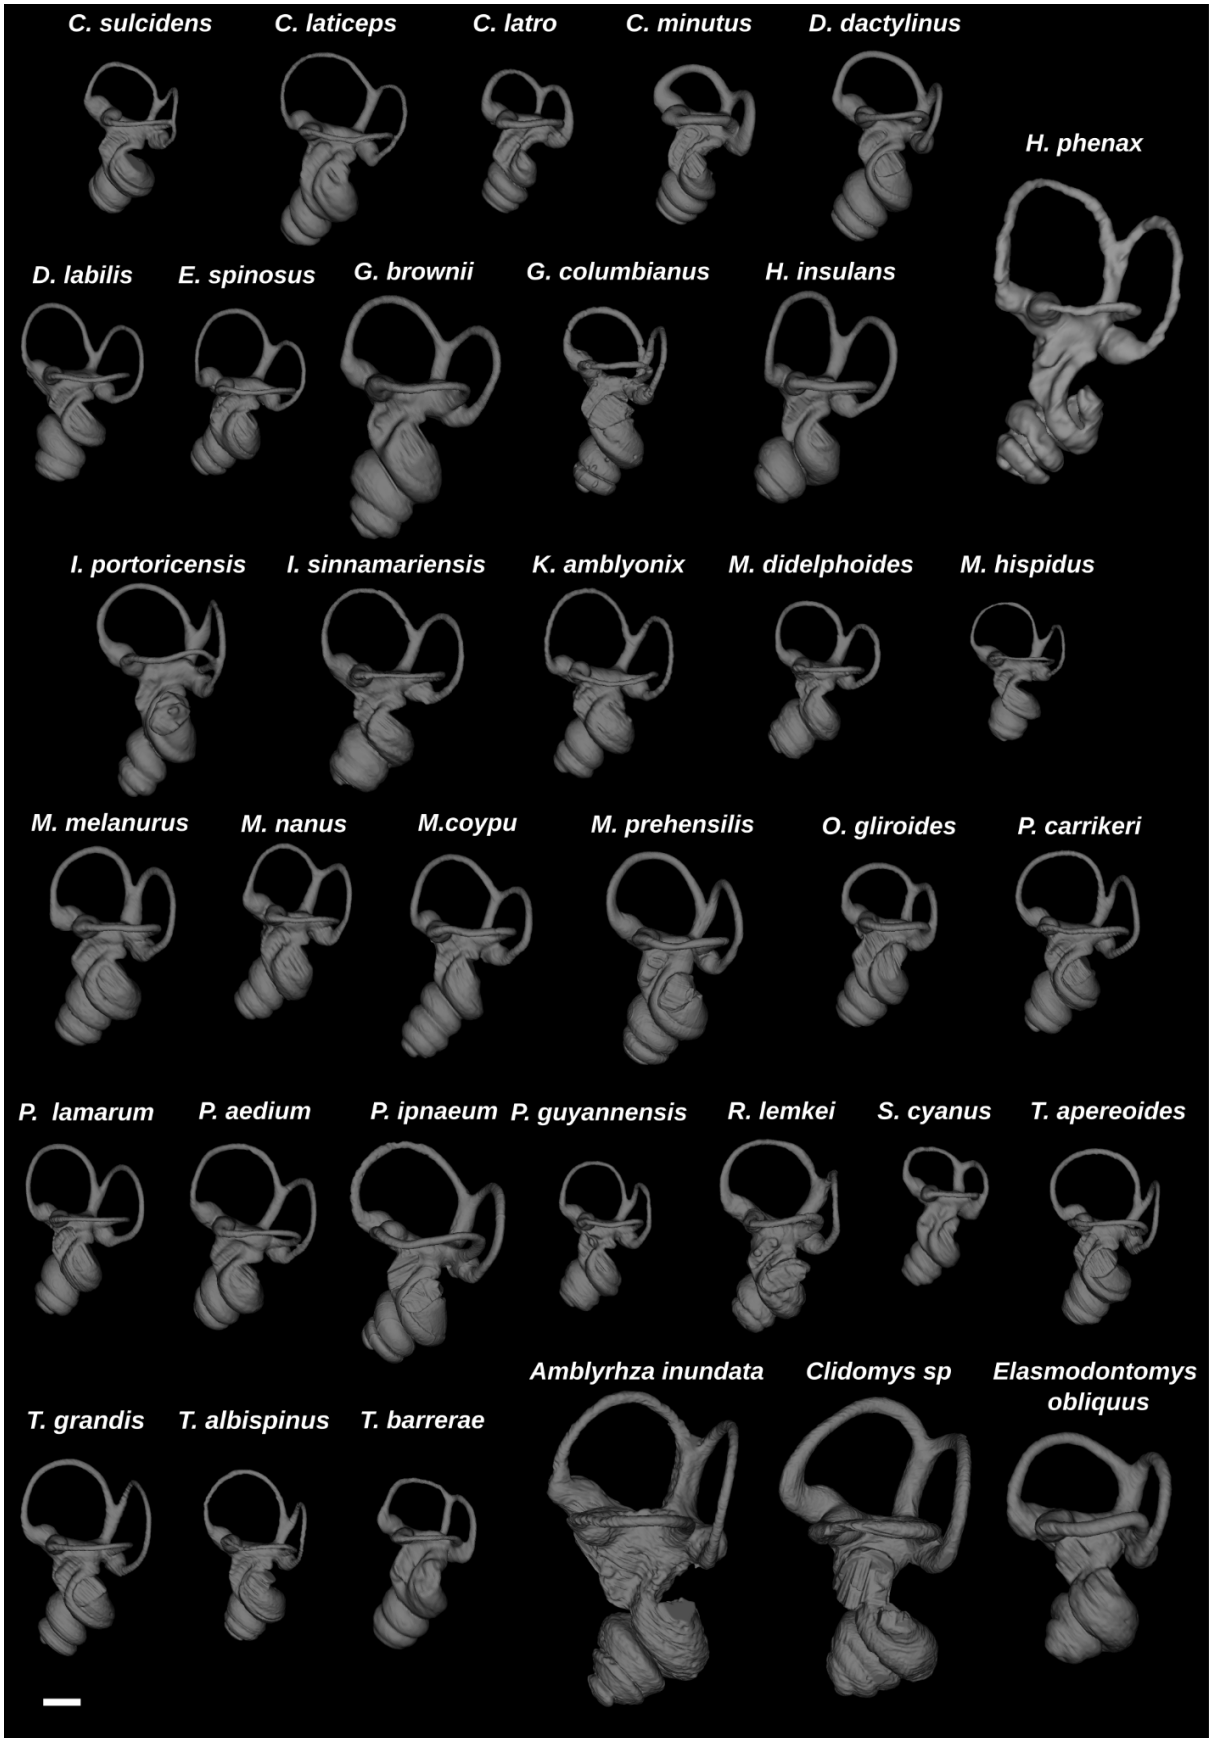

**Fig. S2** Second part of the anatomical plate of the left inner ear of Caviomorpha in lateral view. Scale of all specimens is in the bottom left. Scale = 1mm

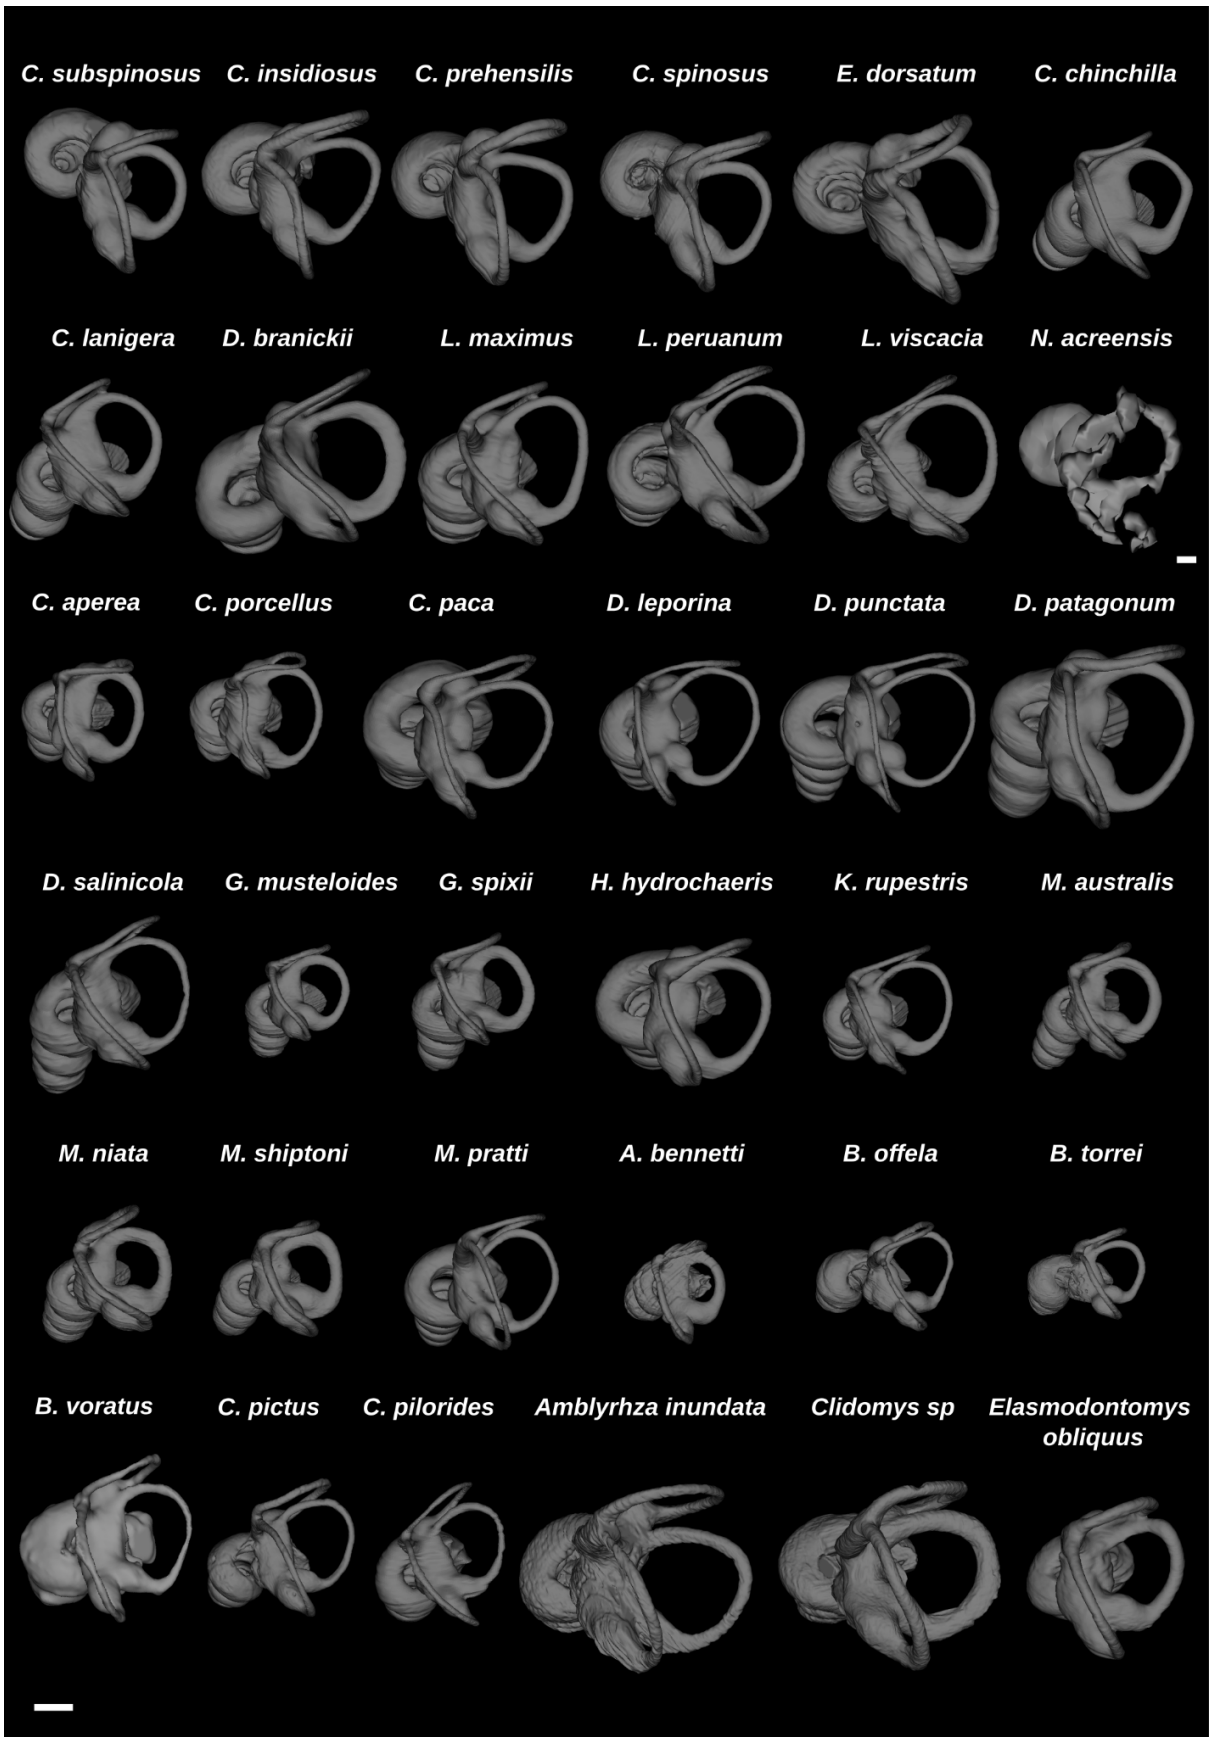

**Fig. S3** First part of the anatomical plate of the left inner ear of Cavimorpha in dorsal view. Scale of all specimens is in the bottom left unless another one is specified for the corresponding species. Scale = 1mm

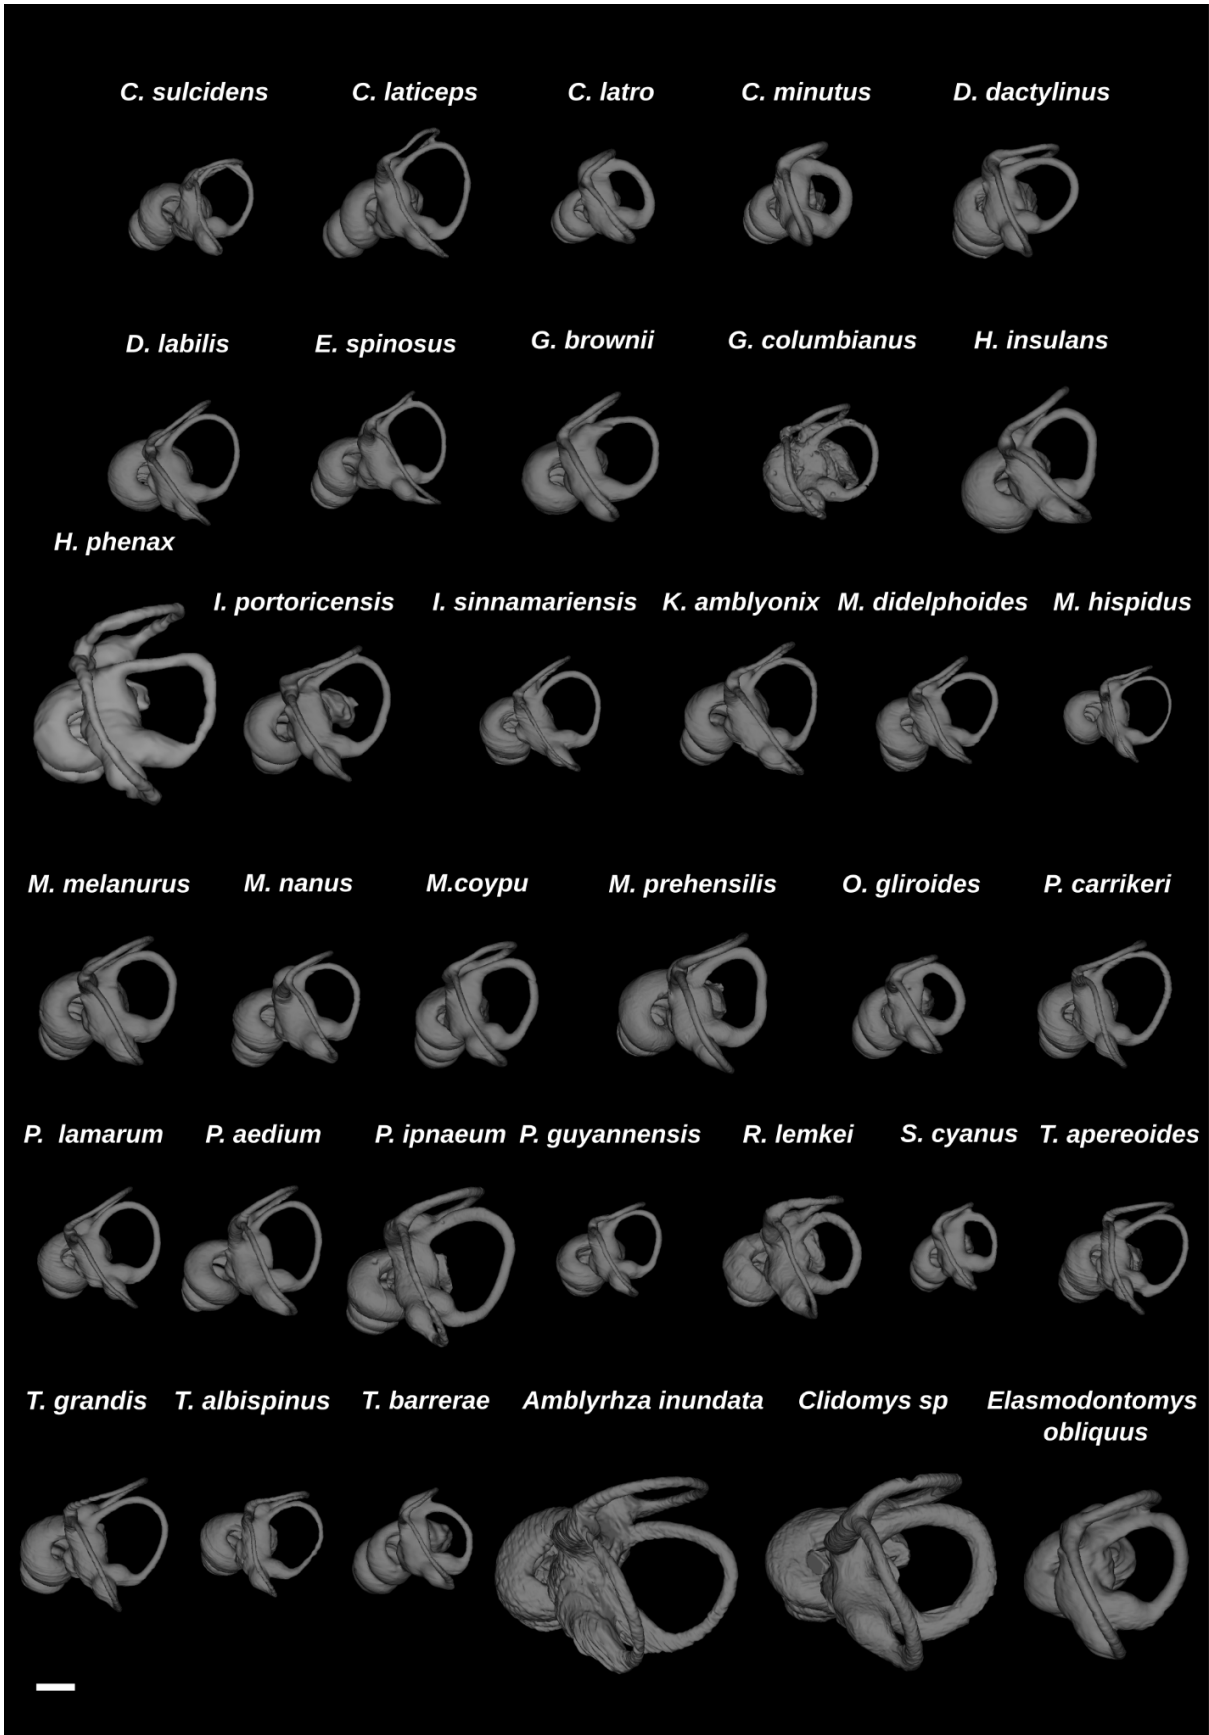

**Fig. S4** First part of the anatomical plate of the left inner ear of Caviomorpha in dorsal view. Scale of all specimens is in the bottom left. Scale = 1mm

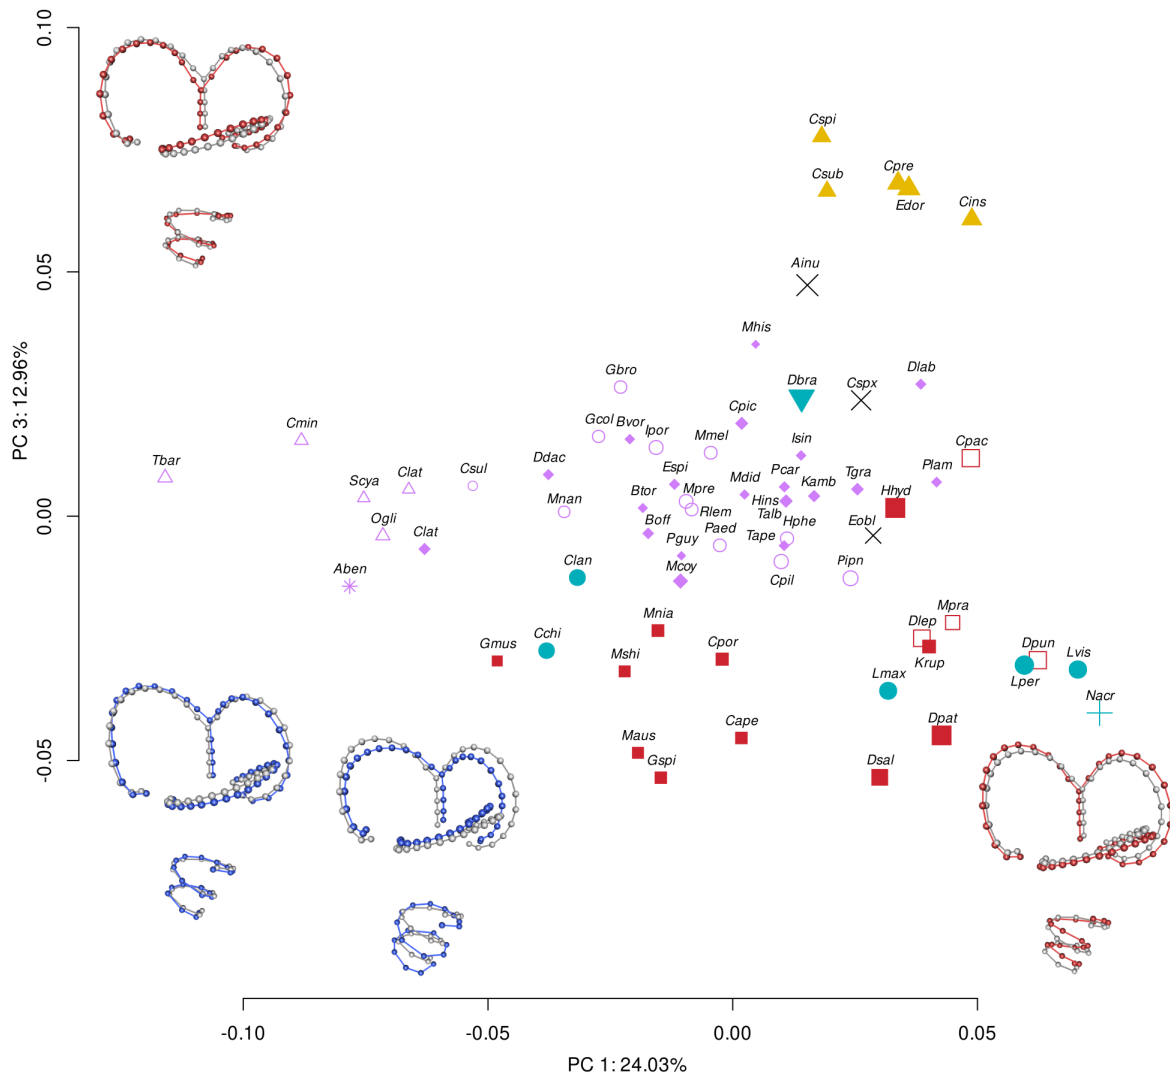

**Fig. S5** Principal component analysis (PCA) of the inner ear shape of Caviomorpha and associated line representation of its morphological variation. Bottom inner ears represent extreme shape variation on PC1 and left inner ears on PC3. Minimum shape is represented in a blue line, maximum shape in a red line, and mean shape in a grey line. The size of the points is proportional to the centroid size of the species. Points color and shapes follow the legend of Fig. 1 in the main text. Abbreviations for the species in the figure can be found in the online resource (Supporting Information, Appendix S1)

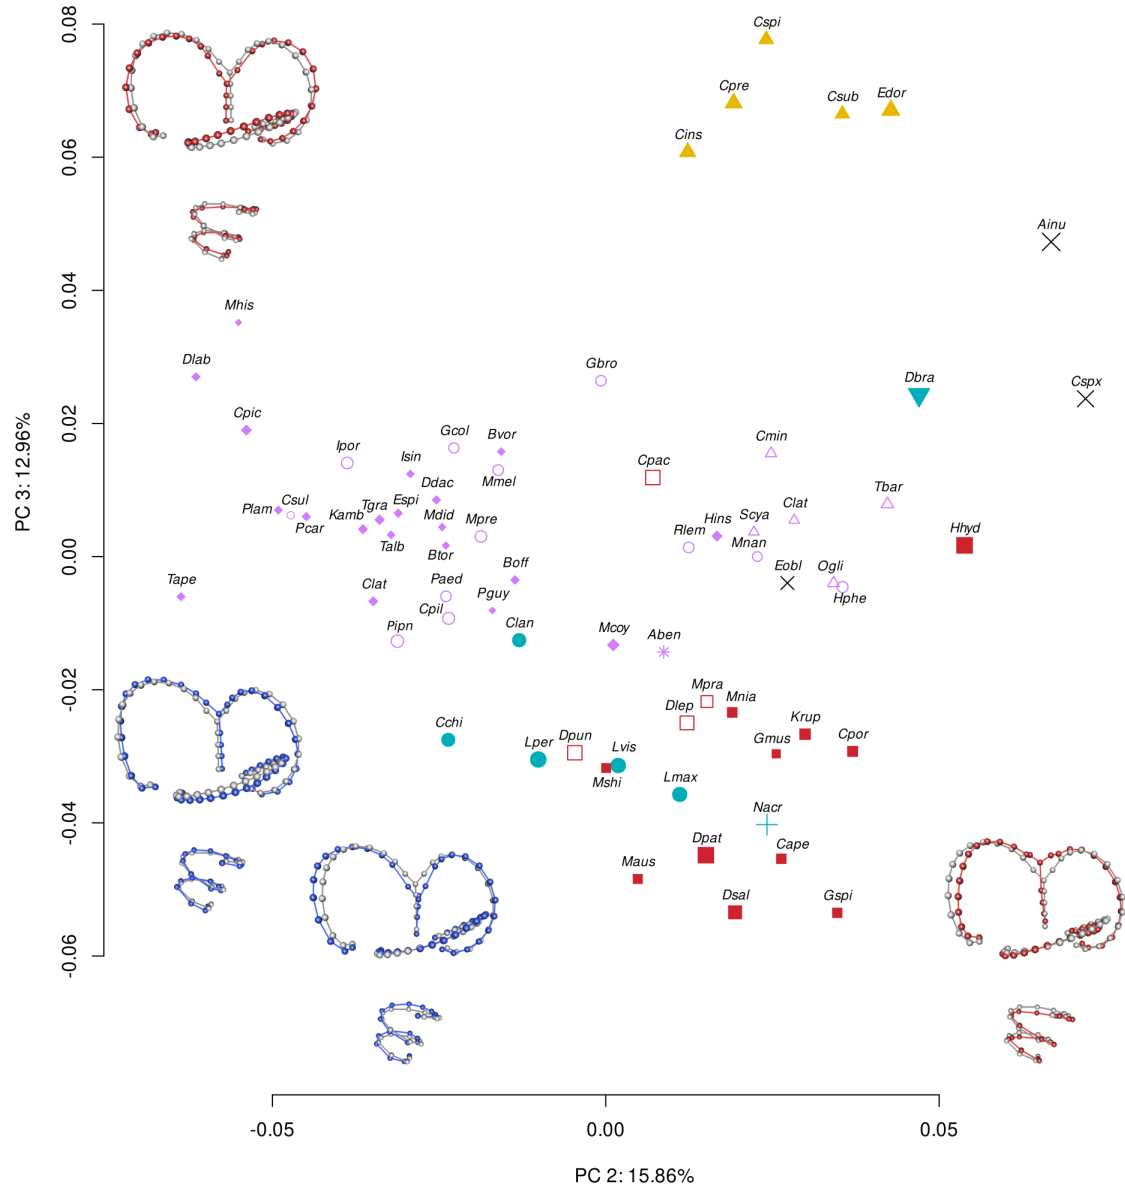

**Fig. S6** Principal component analysis (PCA) of the inner ear shape of Caviomorpha and associated line representation of its morphological variation. Bottom inner ears represent extreme shape variation on PC2 and left inner ears on PC3. Minimum shape is represented in a blue line, maximum shape in a red line, and mean shape in a grey line. The size of the points is proportional to the centroid size of the species. Points color and shapes follow the legend of Fig. 1 in the main text. Abbreviations for the species in the figure can be found in the online resource (Supporting Information, Appendix S1)

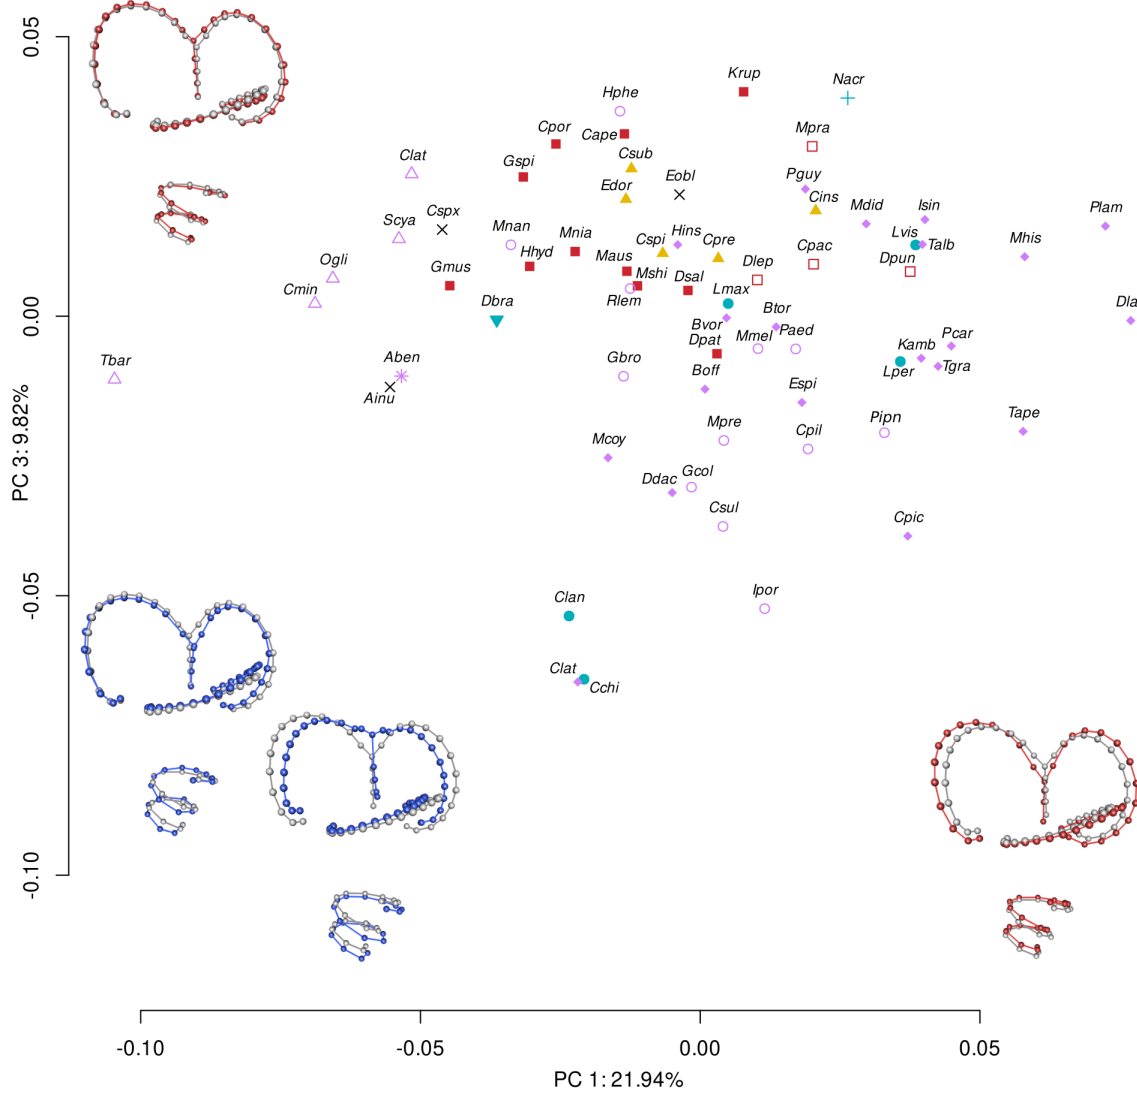

**Fig. S7** Principal component analysis (PCA) of inner ear shape of Caviomorpha corrected for allometry and associated line representation of its morphological variation. Bottom inner ears represent extreme shape variation on PC1 and left inner ears on PC3. Minimum shape is represented in a blue line, maximum shape in a red line, and mean shape in a grey line. Points color and shapes follow the legend of Fig. 1 in the main text. Abbreviations for the species in the figure can be found in the Online Resource (Supporting Information, Appendix S1)



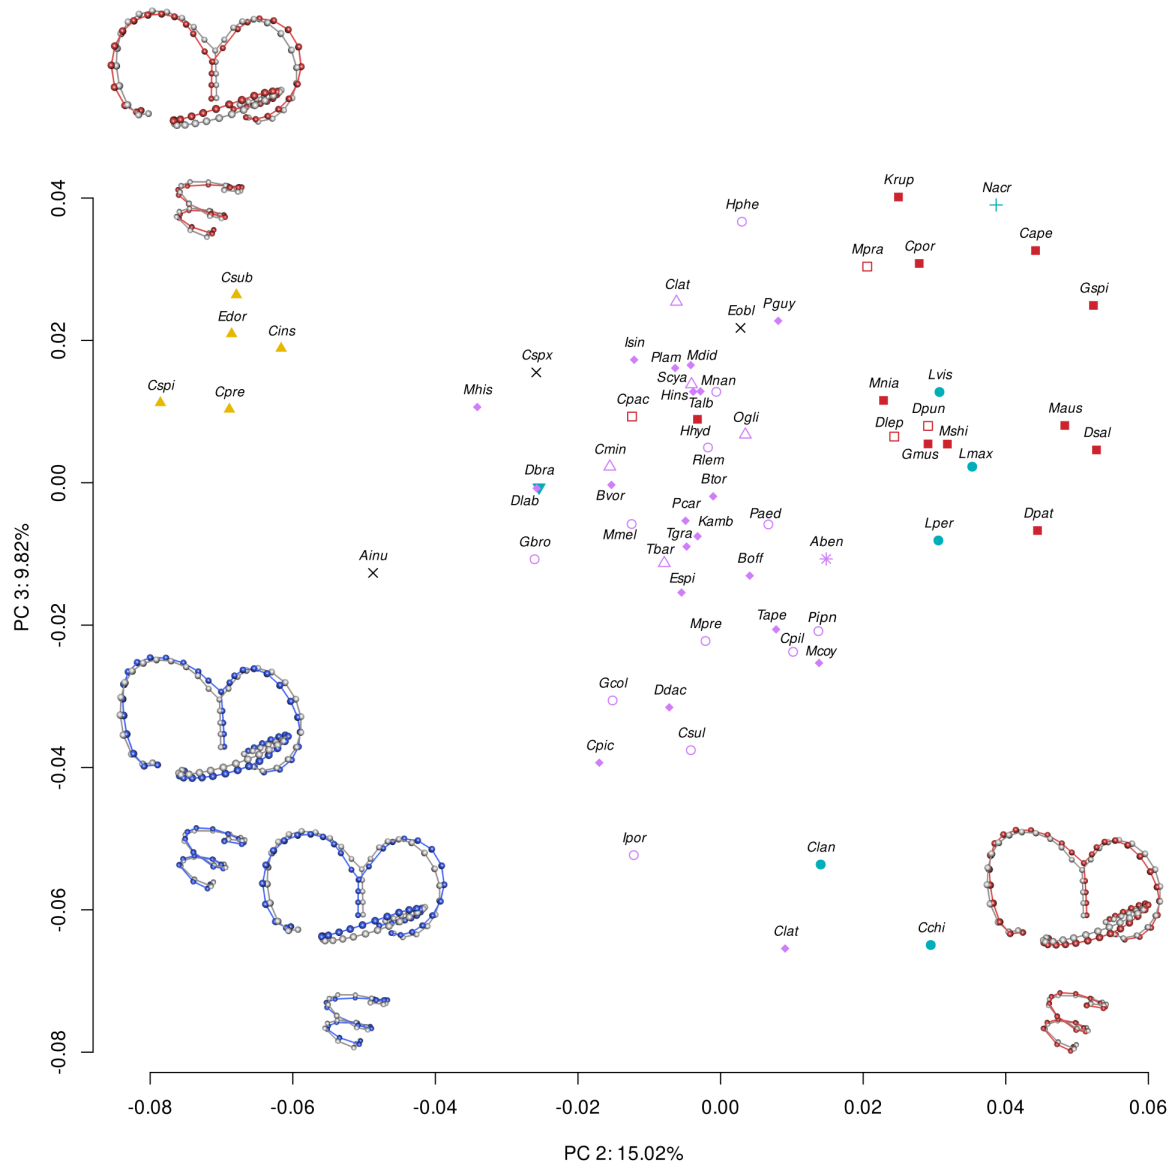

**Fig. S8** Principal component analysis (PCA) of inner ear shape of Cavimorpha corrected for allometry and associated line representation of its morphological variation. Bottom inner ears represent extreme shape variation on PC2 and left inner ears on PC3. Minimum shape is represented in a blue line, maximum shape in a red line, and mean shape in a grey line. Points color and shapes follow the legend of Fig. 1 in the main text. Abbreviations for the species in the figure can be found in the Online Resource (Supporting Information, Appendix S1)

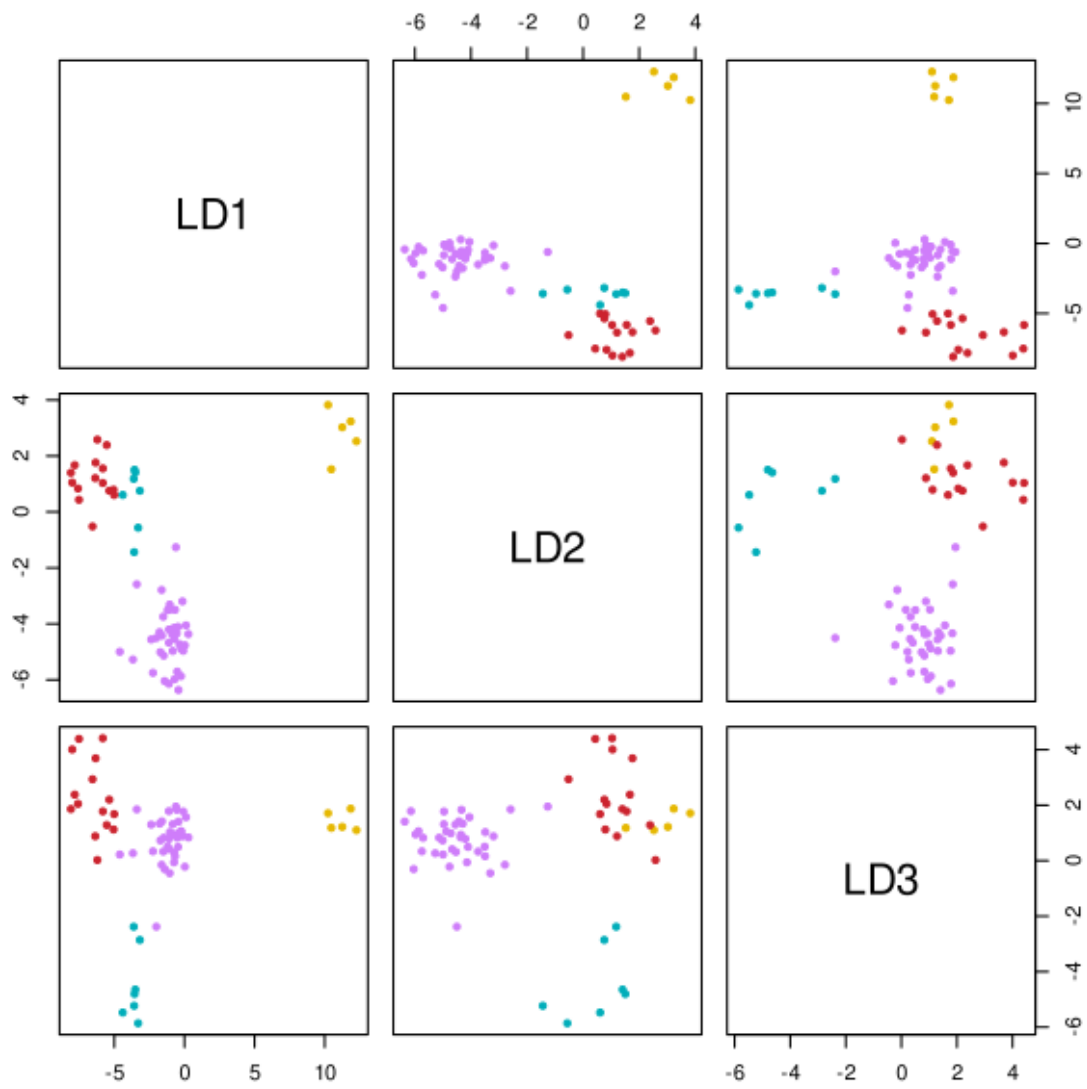

**Fig. S9** Summary of the Linear Discriminant Analysis (LDA) of all species with the exception of Heptaxodontidae. Color of the points correspond to the superfamily: red: Caviioidea, blue: Chinchilloidea, yellow: Erethizontoidea and purple: Octodontoidea

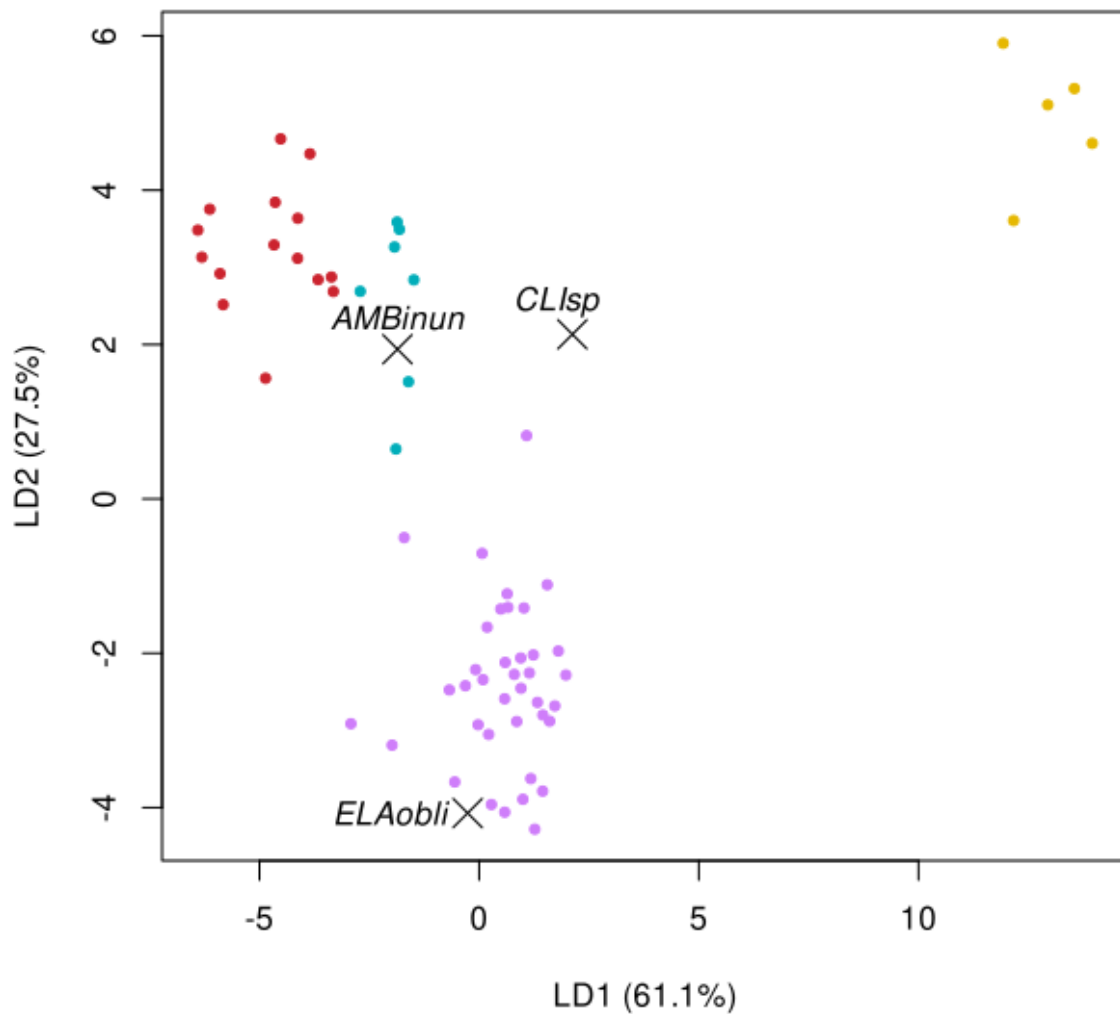

**Fig. S10** Linear Discriminant Analysis (LDA) of all species with a posteriori projection scores of the Heptaxodontidae. LD1 stands for 61.1% of the total variation and LD2 27.5%. Color of the points correspond to the superfamily: red: Cavioidea, blue: Chinchilloidea, yellow: Erethizontoidea and purple: Octodontoidea. Heptaxodontidae are represented by a cross and are colored in black. Abbreviations for the species in the figure can be found in the Online Resource (Supporting Information, Appendix S1)

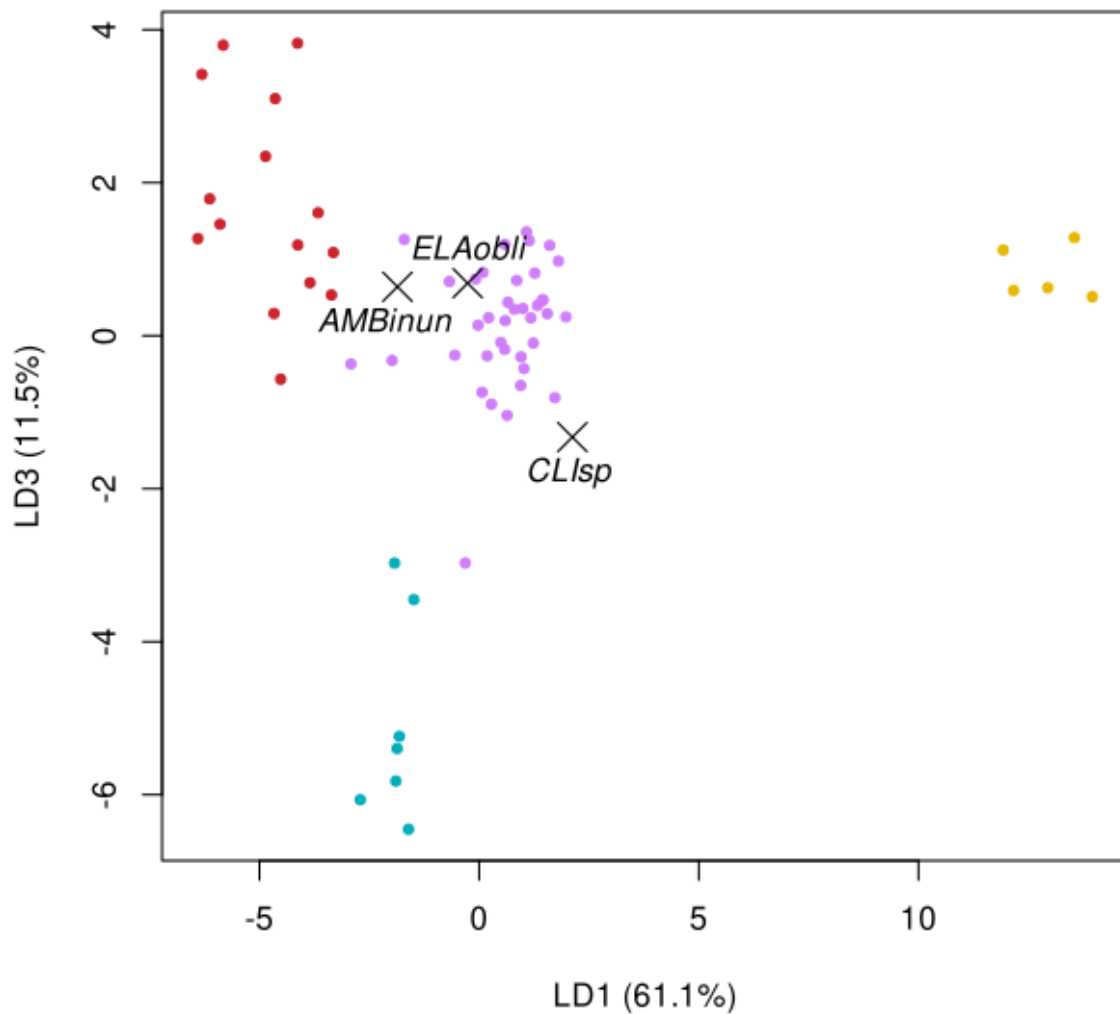

**Fig. S11** Linear Discriminant Analysis (LDA) of all species with a posteriori projection scores of the Heptaxodontidae. LD1 stands for 61.1% of the total variation and LD3 11.5%. Color of the points correspond to the superfamily: red: Cavioidea, blue: Chinchilloidea, yellow: Erethizontoidea and purple: Octodontoidea. Heptaxodontidae are represented by a cross and are colored in black. Abbreviations for the species in the figure can be found in the Online Resource (Supporting Information, Appendix S1)

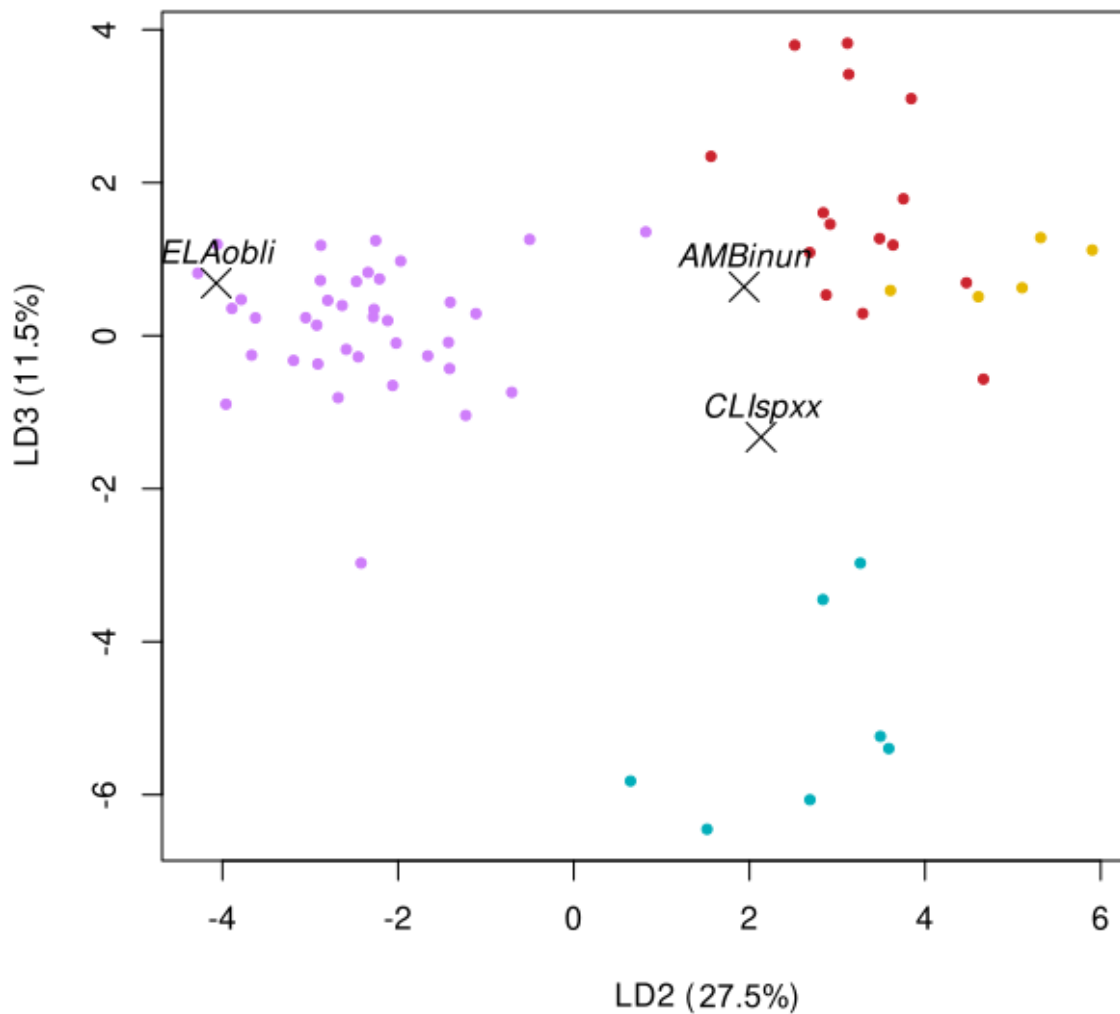

**Fig. S12** Linear Discriminant Analysis (LDA) of all species with a posteriori projection scores of the Heptaxodontidae. LD2 stands for 27.5% of the total variation and LD3 11.5%. Color of the points correspond to the superfamily: red: Cavioidea, blue: Chinchilloidea, yellow: Erethizontoidea and purple: Octodontoidea. Heptaxodontidae are represented by a cross and are colored in black. Abbreviations for the species in the figure can be found in the Online Resource (Supporting Information, Appendix S1)

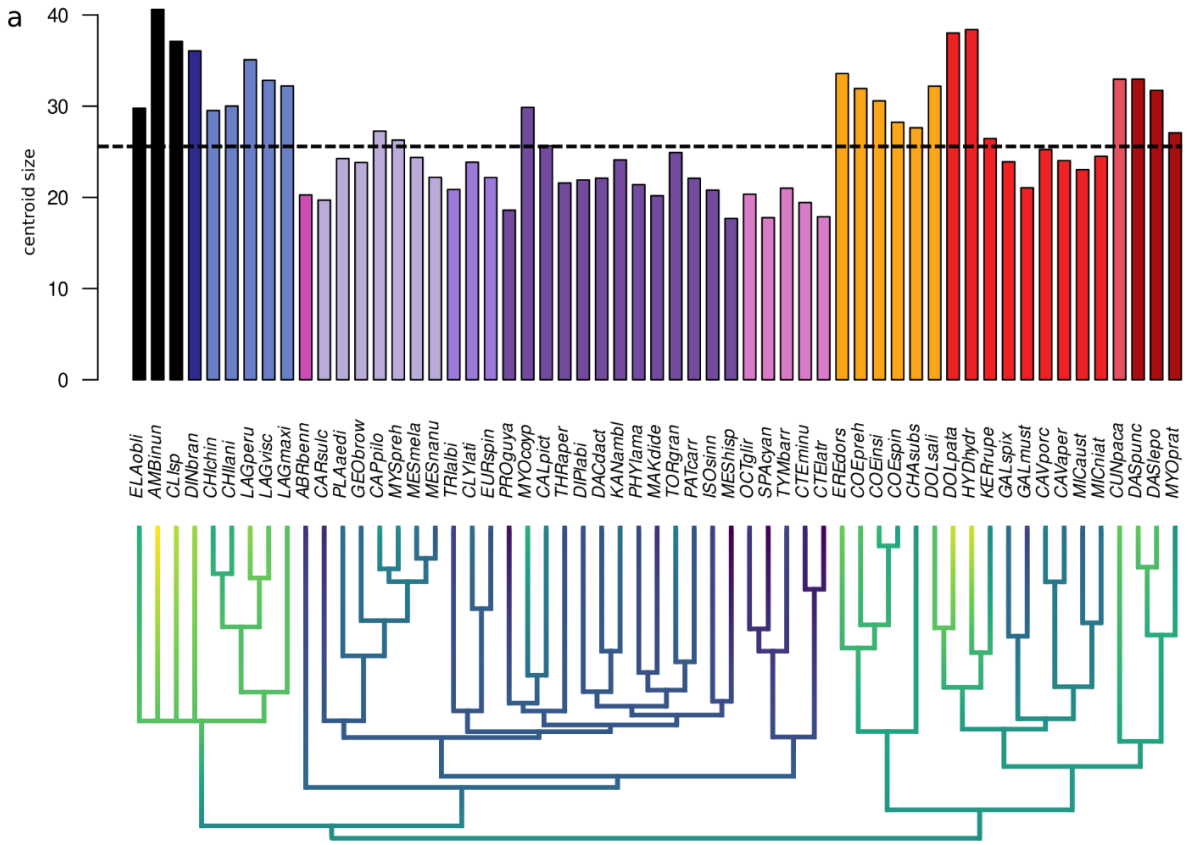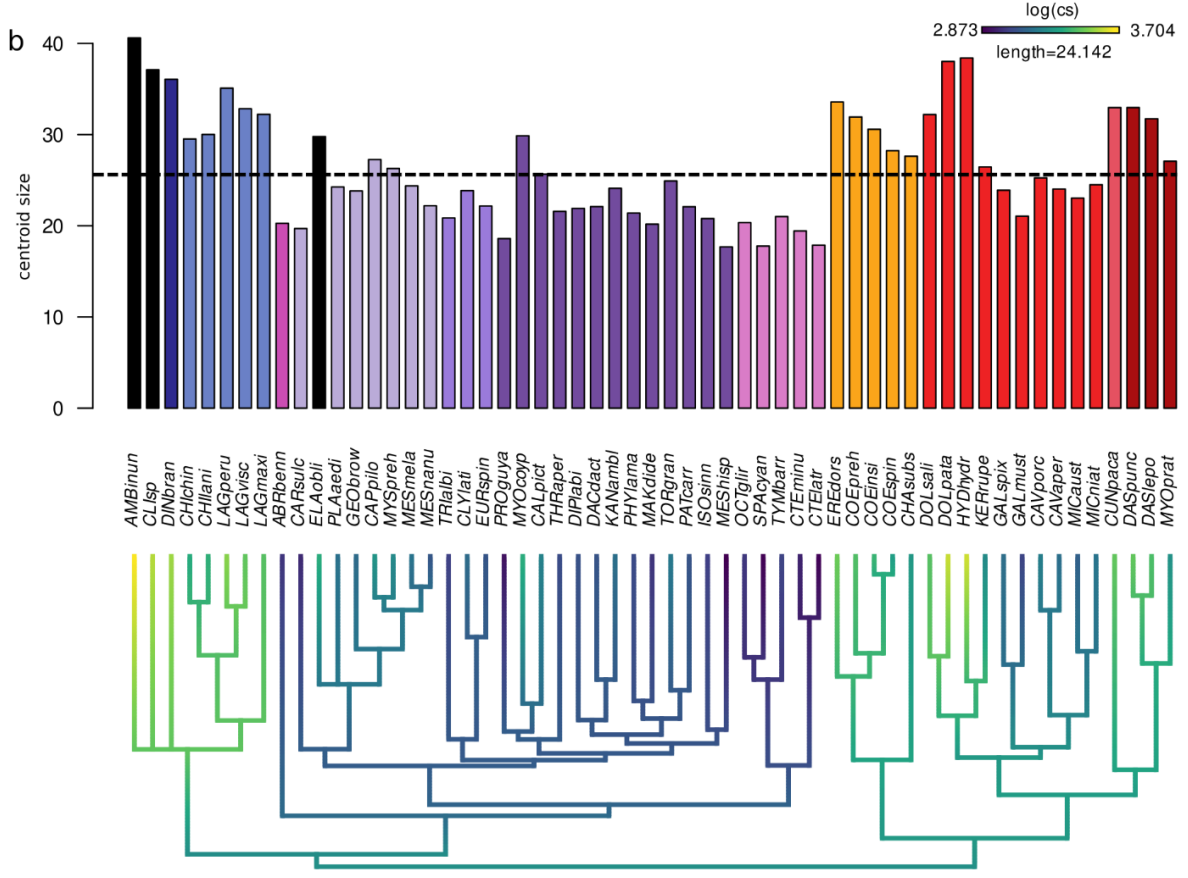

**Fig. S13** Phylogenetic character mapping of the logarithm of the log of centroid size  $\log(cs)$ . The phylogenetic tree of sampled extant species is derived from Upham et al. (2019). The Heptaxodontidae are represented in black and were manually added to the phylogeny in order to illustrate the two evolutive scenarios for the Heptaxodontidae with (a) a monophyletic scenario with *Elasmodotomys obliquus* being part of the Chinchilloidea or (b) a polyphyletic scenario with *Elasmodotomys obliquus* being part of the Octodontoidea. The dashed line correspond to mean centroid size of all species. Colors of the histogram correspond to the different clades of Caviomorpha. From left to right: dark blue: Dinomyidae, blue: Chinchillidae, dark pink: Abrocomidae, light purple: Capromyinae + Carterodontinae, purple: Euryzgomatomyinae, dark purple: Echimyinae, pink: Octodontidae + Ctenomyidae, orange: Erethizontidae, red: Caviidae, light red: Cuniculidae, dark red: Dasyproctidae. Abbreviations for the species in the figure can be found in the Online Resource (Supporting Information, Appendix S1)

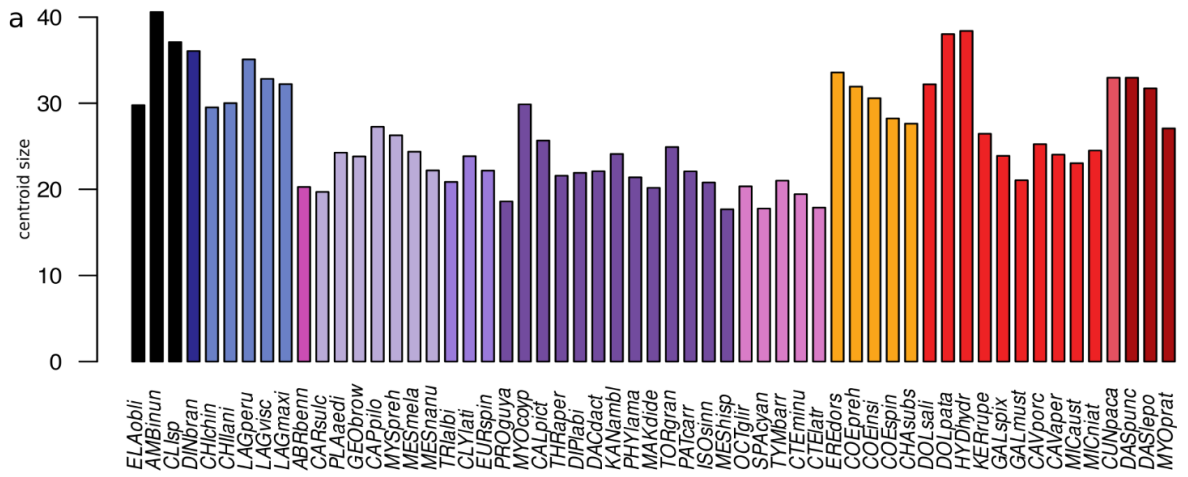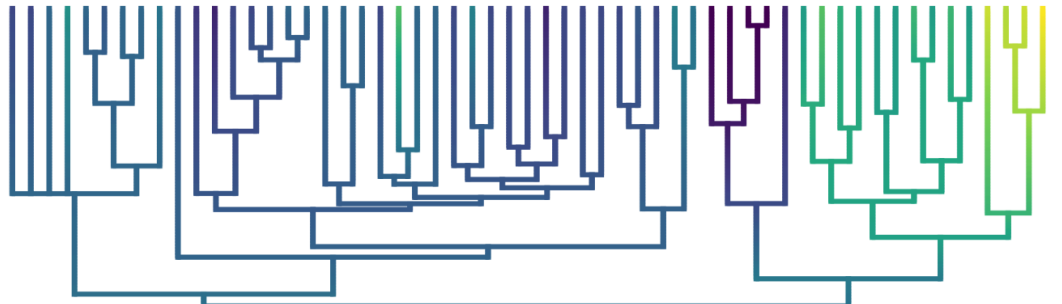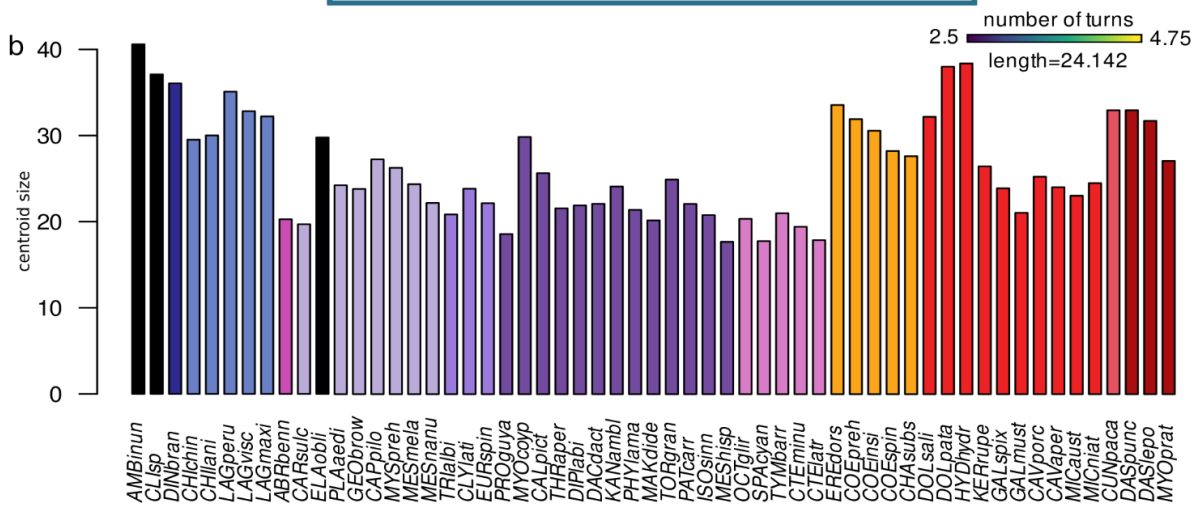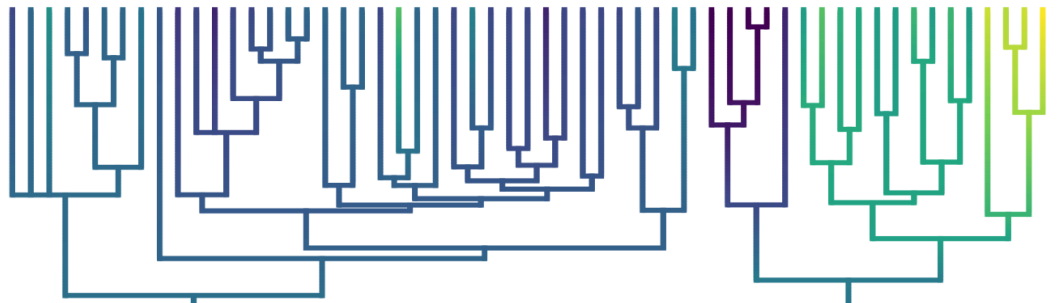



**Fig. S14** Phylogenetic character mapping of the number of turns of the cochlea combined with the centroid size. The phylogenetic tree of sampled extant species is derived from Upham et al. (2019). The Heptaxodontidae are represented in black and were manually added to the phylogeny in order to illustrate the two evolutive scenarios for the Heptaxodontidae with (a) a monophyletic scenario with *Elasmodotomys obliquus* being part of the Chinchilloidea or (b) a polyphyletic scenario with *Elasmodotomys obliquus* being part of the Octodontoidea. The dashed line correspond to mean centroid size of all species. Colors of the histogram correspond to the different clades of Caviomorpha. From left to right: dark blue: Dinomyidae, blue: Chinchillidae, dark pink: Abrocomidae, light purple: Capromyinae + Carterodontinae, purple: Euryzygomatomyinae, dark purple: Echimyinae, pink: Octodontidae + Ctenomyidae, orange: Erethizontidae, red: Caviidae, light red: Cuniculidae, dark red: Dasyproctidae. Abbreviations for the species in the figure can be found in the Online Resource (Supporting Information, Appendix S1)

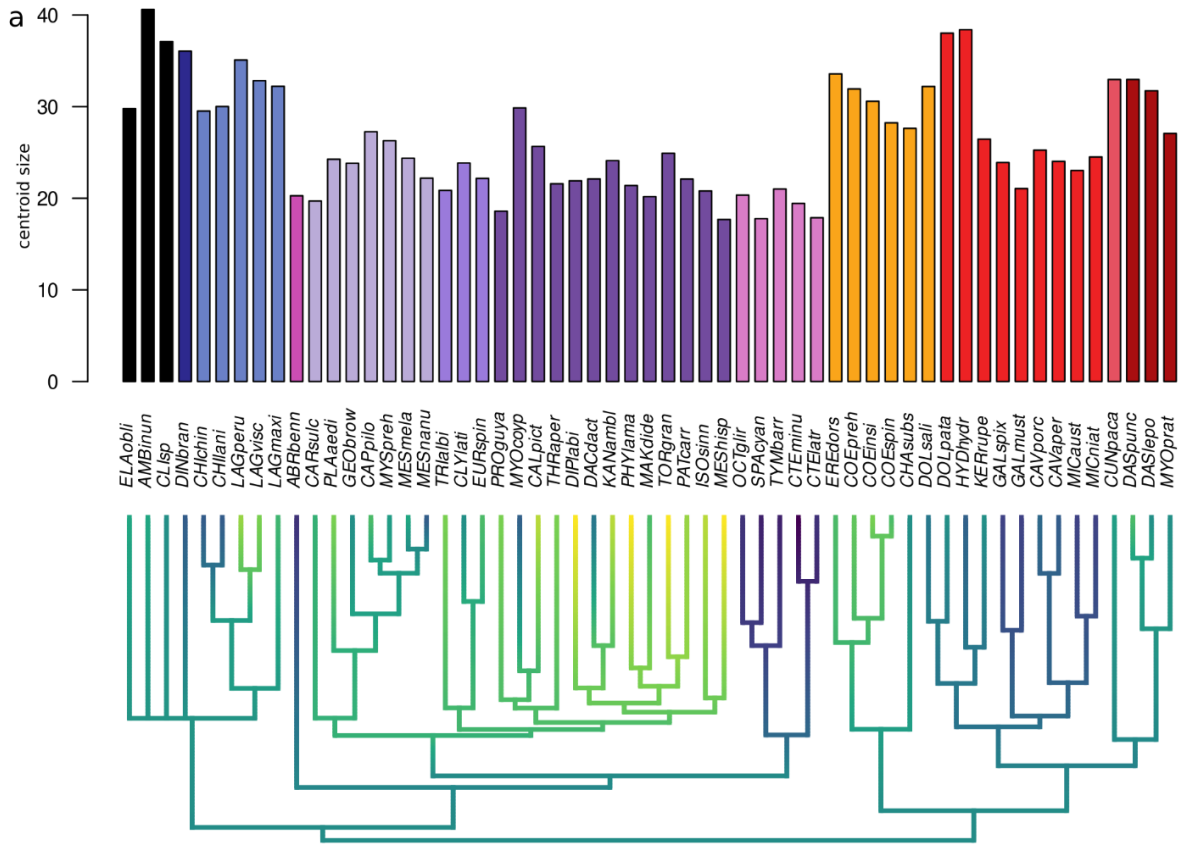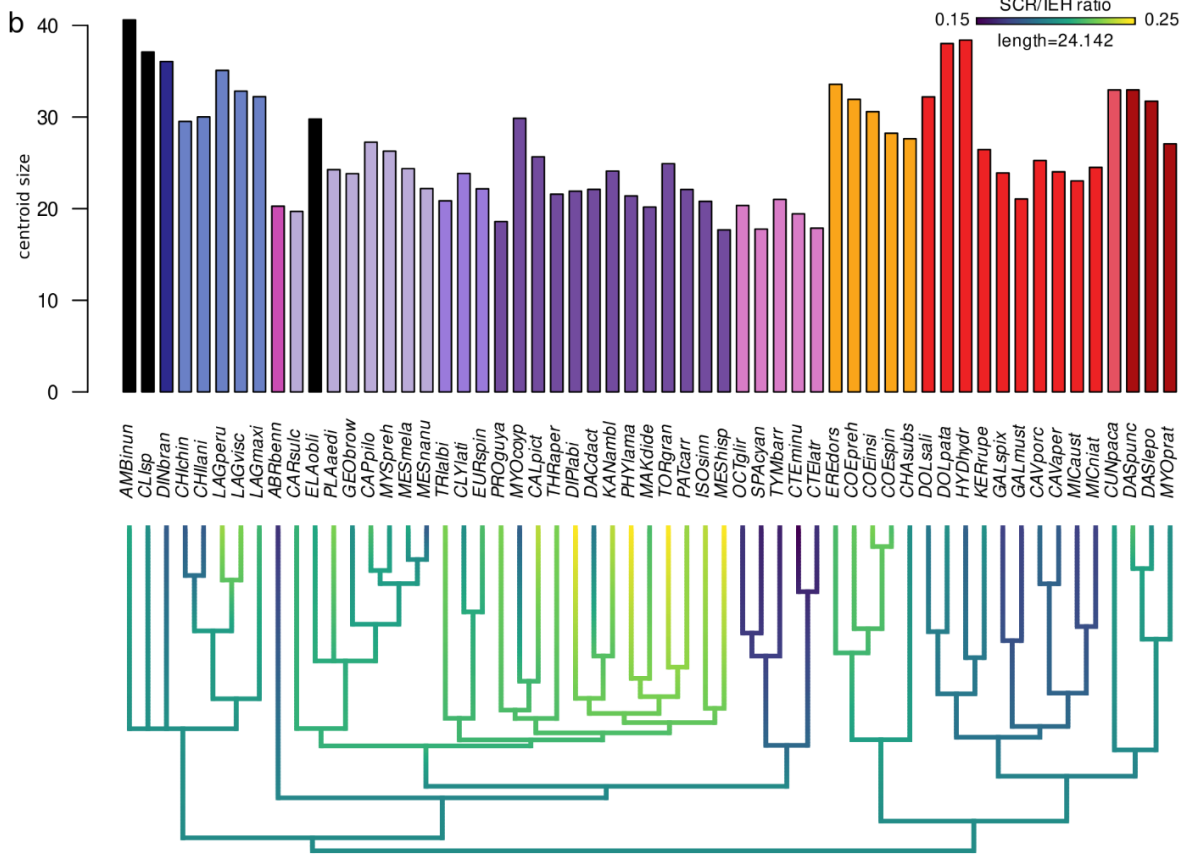

**Fig. S15** Phylogenetic character mapping of the SCR/IEH ratio (see Supplemental Information, Appendix S2) combined with the centroid size. The phylogenetic tree of sampled extant species is derived from Upham et al. (2019). The Heptaxodontidae are represented in black and were manually added to the phylogeny in order to illustrate the two evolutive scenarios for the Heptaxodontidae with (a) a monophyletic scenario with *Elasmodontomys obliquus* being part of the Chinchilloidea or (b) a polyphyletic scenario with *Elasmodontomys obliquus* being part of the Octodontoidea. The dashed line correspond to mean centroid size of all species. Colors of the histogram correspond to the different clades of Caviomorpha. From left to right: dark blue: Dinomyidae, blue: Chinchillidae, dark pink: Abrocomidae, light purple: Capromyinae + Carterodontinae, purple: Euryzomatomyinae, dark purple: Echimyinae, pink: Octodontidae + Ctenomyidae, orange: Erethizontidae, red: Caviidae, light red: Cuniculidae, dark red: Dasyproctidae. Abbreviations for the species in the figure can be found in the Online Resource (Supporting Information, Appendix S1)
